# Supplementary material for: Metabolomic Profiling of Hormonal Contraceptive Use in Young Females Using a Commercially Available LC-MS/MS Kit
Source: MDPI journal article supplement (doi:10.3390/metabo13101092), 2023-10-18
Supplement: s1 [file s1]

Supplementary material to:

**Metabolomic profiling of hormonal contraceptive use in young females using a commercially available LC-MS/MS kit**

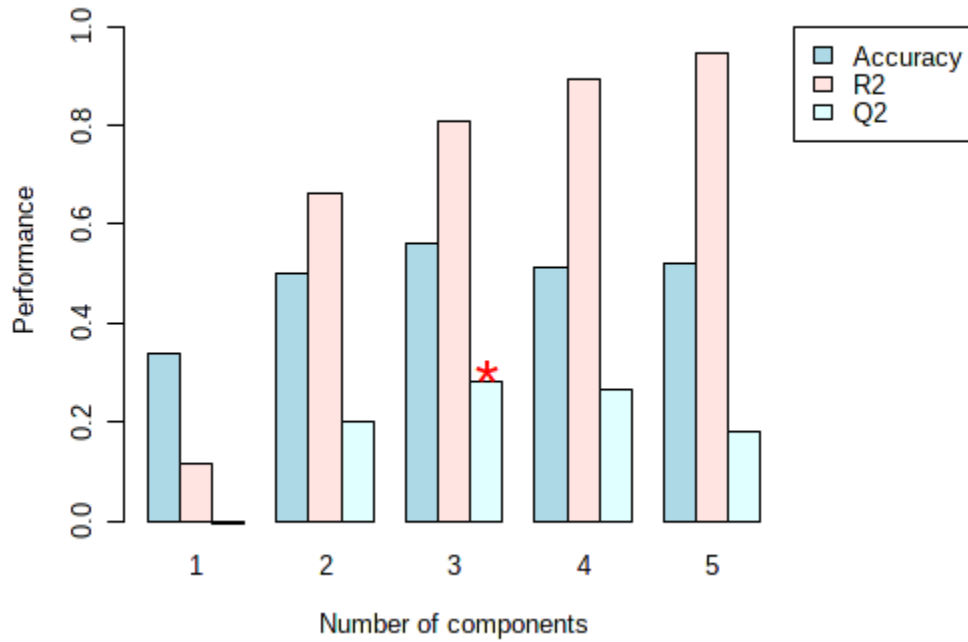

Figure S1. PLS-DA classification, indicating the best classifier (red star)

Table S1: Summary of the metabolites deleted from the dataset after applying a zero (below limit of detection) filter

| Metabolite class          | Number of metabolites deleted | Total metabolites potentially detectable per class | % deleted | Used in statistical analyses |
|---------------------------|-------------------------------|----------------------------------------------------|-----------|------------------------------|
| Acylcarnitines            | 40                            | 40                                                 | 100       | 0                            |
| Alkaloids                 | 1                             | 1                                                  | 100       | 0                            |
| Aminoacids                | 1                             | 20                                                 | 5         | 19                           |
| Aminoacids related        | 18                            | 30                                                 | 60        | 12                           |
| Amine oxides              | 0                             | 1                                                  | 0         | 1                            |
| Bile acids                | 14                            | 14                                                 | 100       | 0                            |
| Biogenic amines           | 7                             | 9                                                  | 78        | 2                            |
| Carbohydrates and Related | 0                             | 1                                                  | 0         | 1                            |
| Carboxylic acids          | 6                             | 7                                                  | 86        | 1                            |
| Ceramides                 | 24                            | 28                                                 | 86        | 4                            |
| Cholesterol esters        | 13                            | 22                                                 | 59        | 9                            |
| Cesols                    | 1                             | 1                                                  | 100       | 0                            |
| Diglycerides              | 33                            | 44                                                 | 75        | 11                           |
| Dihexosylceramides        | 8                             | 9                                                  | 89        | 1                            |
| Dihydroceramides          | 7                             | 8                                                  | 88        | 1                            |
| Fatty acids               | 11                            | 12                                                 | 92        | 1                            |
| Hexosylceramides          | 16                            | 19                                                 | 84        | 3                            |
| Hormones                  | 3                             | 4                                                  | 75        | 1                            |
| Indoles derivatives       | 3                             | 4                                                  | 75        | 1                            |
| Lysophosphatidylcholines  | 8                             | 14                                                 | 57        | 6                            |
| Nucleobases related       | 2                             | 2                                                  | 100       | 0                            |
| Phosphatidylcholines      | 21                            | 76                                                 | 28        | 55                           |
| Sphingomyelins            | 15                            | 15                                                 | 100       | 0                            |
| Triglycerides             | 95                            | 242                                                | 39        | 147                          |
| Trihexosylceramides       | 6                             | 6                                                  | 100       | 0                            |
| Vitamins & cofactors      | 0                             | 1                                                  | 0         | 1                            |
| <b>TOTAL</b>              | <b>353</b>                    | <b>630</b>                                         | <b>56</b> | <b>277</b>                   |
